# Supplementary material
Source: Springer Nature journal article supplement (https://www.springermedizin.de/resource/supplementary/12984_2010_318_MOESM1_ESM.pdf/9605762)

Graphical Display

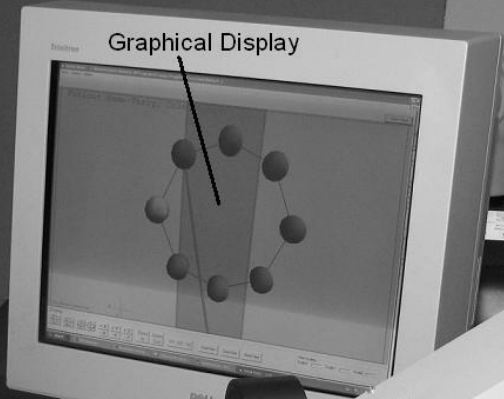

Robot Arm

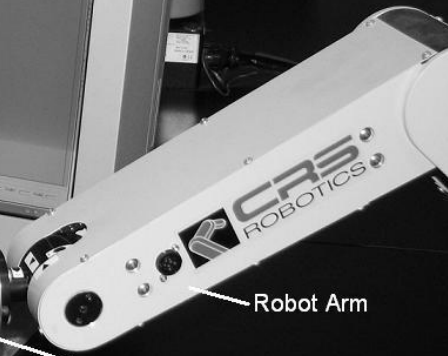

Force Sensor

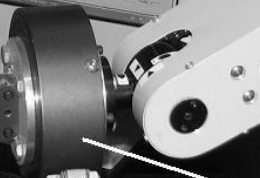

Wrist Splint

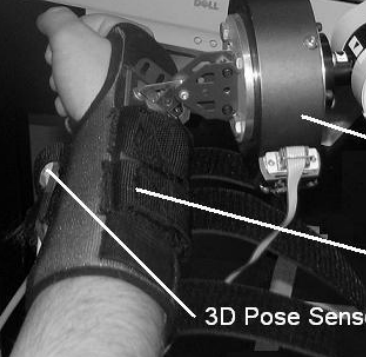

3D Pose Sensor

Supplement: MOESM1 [file 9605762]
